# Supplementary material
Source: HighWire-hosted journal article supplement (https://www.cmajopen.ca/highwire/filestream/87652/field_highwire_adjunct_files/0/2021-0043-1-at.pdf)
Supplement: 2021-0043-1-at.pdf [file 2021-0043-1-at.pdf]

**Table S1. Eligible conditions and codes for targeted enrolment programs**

| Program                                    | Eligible conditions and codes                                                                                                                                   | Description                                                                                                               |
|--------------------------------------------|-----------------------------------------------------------------------------------------------------------------------------------------------------------------|---------------------------------------------------------------------------------------------------------------------------|
| <b>Quebec<br/>Vulnerable<br/>Enrolment</b> | Diabetes<br>ICD-9: 250 excluding: 650-659 (pregnancy)<br>ICD-10: E10-E14                                                                                        | Binary indicator: 1 if 1 hospitalization or 2 outpatient visits within 2 years; otherwise 0                               |
|                                            | Cancer<br>ICD-9: 140-172; 174-208<br>ICD-10: C00-C43; C45-C97                                                                                                   | Binary indicator: Has cancer if 1 hospitalization or 2 outpatient visits within 2 years; otherwise 0                      |
|                                            | COPD<br>ICD-9: 491- 492; 496<br>ICD-10: J41-J44                                                                                                                 | Binary indicator: 1 if 1 hospitalization or 1 outpatient visits; otherwise 0                                              |
|                                            | Asthma<br>ICD-9: 493<br>ICD-10: J45-J46                                                                                                                         | Binary indicator: 1 if hospitalization or 2 outpatient visits within 2 years AND a oral steroid prescription; otherwise 0 |
|                                            | Chronic Inflammation<br>ICD-9: 555-556; 558; 136.1; 710; 712 -714; 716; 719; 720; 725; 728; 729; 695.4; 696.0<br>ICD-10: K50-K52; M05-M06; M13; M32-M36; L40.50 | Binary indicator: 1 if 1 hospitalization or 2 outpatient visits within 2 years; otherwise 0                               |
|                                            | Central Nervous System disease (CNS)<br>ICD-9: 330-335; 290; 136.9<br>ICD-10: G10; G12-G14; G20-G23; G25-G26; G30-G32; G35-G37; F01-F03; G903                   | Binary indicator: 1 if 1 hospitalization or 2 outpatient visits within 2 years; otherwise 0                               |
|                                            | Occupational Lung disease<br>ICD-9: 117.3; 495; 500-508; 511.0<br>ICD-10: J60-J70; J92.0                                                                        | Binary indicator: 1 if 1 hospitalization or 1 outpatient visits within 2 year; otherwise 0                                |
|                                            | Coronary Artery Disease (CAD)<br>ICD-9: 410-414<br>ICD-10: I20-I25                                                                                              | Binary indicator: 1 if hospitalization or 2 outpatient visits within 2 years; otherwise 0                                 |
|                                            | Heart Failure (HF)<br>ICD-9: 428<br>ICD-10: I50                                                                                                                 | Binary indicator: 1 if 1 hospitalization or 2 outpatient visits within 1 rolling year; otherwise 0                        |
|                                            | Atrial Fibrillation (AF)<br>ICD-9: 427; 785.0<br>ICD-10: I48                                                                                                    | Binary indicator: 1 if 1 hospitalization or 1 outpatient visit within 1 year; otherwise 0                                 |
|                                            | Mental Health Conditions (e.g., depression/ anxiety, psychosis etc.)<br>ICD-9: 295- 302; 306-319<br>ICD-10: F20-F54; F56-F99                                    | Binary indicator: 1 if 1 hospitalization or 2 ambulatory visits within 1 year; otherwise 0                                |
|                                            | HIV<br>ICD-9: 042<br>ICD-10: B20-B24                                                                                                                            | Binary indicator: 1 if 1 hospitalization or 2 outpatient visits within 2 years; otherwise 0                               |
|                                            | Renal Failure<br>ICD-9: 582-587; 589<br>ICD-10: N01-N07; N17-N19; N26-N27                                                                                       | Binary indicator: 1 if 1 hospitalization or 2 outpatient visits within 2 years; otherwise 0                               |
|                                            | Thrombolytic Event<br>ICD-9: 415; 434.01; 434.11; 434.91<br>ICD-10: I26; I63                                                                                    | Binary indicator: 1 if 1 hospitalization or 2 outpatient visits within 2 years; otherwise 0                               |
|                                            | Substance Abuse<br>ICD-9: 291-292; 303-305; 980<br>ICD-10: F10-F16; F18-F19; T51                                                                                | Binary indicator: 1 if 1 hospitalization or 1 outpatient visits within 1 year; otherwise 0                                |

|                                     |                                                                                                                                                                                                                                                                                                                                                                                                                                                                                                                                                                                                                                                                                                            |                                                                                                    |
|-------------------------------------|------------------------------------------------------------------------------------------------------------------------------------------------------------------------------------------------------------------------------------------------------------------------------------------------------------------------------------------------------------------------------------------------------------------------------------------------------------------------------------------------------------------------------------------------------------------------------------------------------------------------------------------------------------------------------------------------------------|----------------------------------------------------------------------------------------------------|
| <b>BC Chronic Disease Incentive</b> | <p>Diabetes<br/> ICD-9: 250 excluding: ICD9: 641-676, V27; ICD-10-CA: O1, O29-O95, O98, O99, Z37 (pregnancy)<br/> BC-specific complex care codes: N250, R250, I250, H250, D430, D585, D573<br/> ICD-10: E10-E14</p>                                                                                                                                                                                                                                                                                                                                                                                                                                                                                        | Binary indicator: 1 if 1 hospitalization or 2 outpatient visits within 2 years; otherwise 0        |
|                                     | <p>Heart Failure (HF)<br/> ICD-9: 428<br/> BC-specific complex care codes: N428, R428, I428, H250, H430, H585, H573<br/> ICD-10: I50</p>                                                                                                                                                                                                                                                                                                                                                                                                                                                                                                                                                                   | Binary indicator: 1 if 1 hospitalization or 2 outpatient visits within 1 rolling year; otherwise 0 |
| <b>BC Complex Care Incentive</b>    | <p>2 or more of diabetes, CHD, CKD/renal failure, cerebrovascular disease, coronary artery disease, asthma, COPD, as above with the inclusion of BC complex care codes: N519, N414, N428, N250, N430, N585, N573, R414, R428, R250, R430, R585, R573, I428, I250, I430, I585, I573, H250, H430, H585, H573, D430, D585, D573, C585, C573, K573</p> <p>Note, codes for cerebrovascular disease as follow:<br/> ICD-9: 362.3, 430, 431, 433.x1, 434-436<br/> ICD-10-CA: I60, I61, I63, I64, G45.0-G45.3, G45.8, G45.9, H34.1<br/> excluding: ICD-9: 800, 801, 802, 803, 804, 850, 851, 852, 853, 854, V57, ICD-10-CA: S02.0-S02.4, S02.6, S02.8, S02.9, S06, Z50<br/> (traumatic injury on the same day)</p> | Binary indicator: 1 if two or more eligible conditions; otherwise                                  |

**Table S2. Databases accessed in British Columbia (BC) and Quebec (QC)**

| Database                                  | Description                                                                                                                            | Variables                                                                                                                    |
|-------------------------------------------|----------------------------------------------------------------------------------------------------------------------------------------|------------------------------------------------------------------------------------------------------------------------------|
| Client registry                           | Central demographics files maintained by provincial insurers                                                                           | Age, sex/gender, neighbourhood income quintile, urban/rural residence                                                        |
| Physician payments                        | Data on medically necessary services provided by fee-for-service practitioners to individuals covered by the provincial insurance plan | Ambulatory physician visits, longitudinal continuity of care, Elixhauser index, treatment for mental health or substance use |
| Hospitalizations                          | Data on discharges, transfers and deaths of in-patients and day surgery patients from acute care hospitals                             | Elixhauser index, treatment for mental health or substance use                                                               |
| PharmaNet (BC only)                       | All prescriptions for drugs and medical supplies dispensed from community pharmacies in BC, including source of coverage               | Prescription drug coverage indicates income assistance                                                                       |
| National Ambulatory Reporting Care System | Information about ED visits                                                                                                            | Emergency department visits                                                                                                  |
| Vital statistics                          | Information on all deaths registered                                                                                                   | Used to construct cohorts                                                                                                    |
